# Supplementary material for: Scalable production of tissue-like vascularized liver organoids from human PSCs
Source: PubMed Central journal article supplement (PMC10545717; doi:10.1038/s12276-023-01074-1), 2023-09-01
Supplement: 12276_2023_1074_MOESM1_ESM.pdf [file 12276_2023_1074_MOESM1_ESM.pdf]

**Title: Scalable production of tissue-like vascularised liver organoids from human PSCs.**

**Running Title: Scalable liver organoid production.**

Authors: Sean P Harrison<sup>1,2†</sup>, Richard Siller<sup>3†</sup>, Yoshiaki Tanaka<sup>4,5†</sup>, Maria E Chollet<sup>6,7†</sup>, María Eugenia de la Morena-Barrio<sup>8</sup>, Yangfei Xiang<sup>4</sup>, Benjamin Patterson<sup>4</sup>, Elisabeth Andersen<sup>6,7</sup>, Carlos Bravo-Pérez<sup>8</sup>, Henning Kempf<sup>9</sup>, Kathrine S Åsrud<sup>10,11</sup>, Oleg Lunov<sup>12</sup>, Alexandr Dejnek<sup>12</sup>, Marie-Christine Mowinckel<sup>6,7</sup>, Benedicte Stavik<sup>6,7</sup>, Per Morten Sandset<sup>6,7,11</sup>, Espen Melum<sup>1,7,10,11,13,14</sup>, Saphira Baumgarten<sup>1,2</sup>, Flavio Bonanini<sup>15</sup>, Dorota Kurek<sup>15</sup>, Santosh Mathapati<sup>3</sup>, Runar Almaas<sup>2,11,14</sup>, Kulbhushan Sharma<sup>3</sup>, Steven R Wilson<sup>1,16</sup>, Frøydis S Skottvoll<sup>1,16</sup>, Ida C Boger<sup>16</sup>, Inger L Bogen<sup>17</sup>, Tuula A Nyman<sup>18</sup>, Jun Jie Wu<sup>19</sup>, Ales Bezrouk<sup>20</sup>, Dana Cizkova<sup>21</sup>, Javier Corral<sup>8</sup>, Jaroslav Mokry<sup>21</sup>, Robert Zweigerdt<sup>9</sup>, In-Hyun Park<sup>4</sup>, Gareth J Sullivan<sup>1,2,3,18\*</sup>

**Supplementary Materials:**

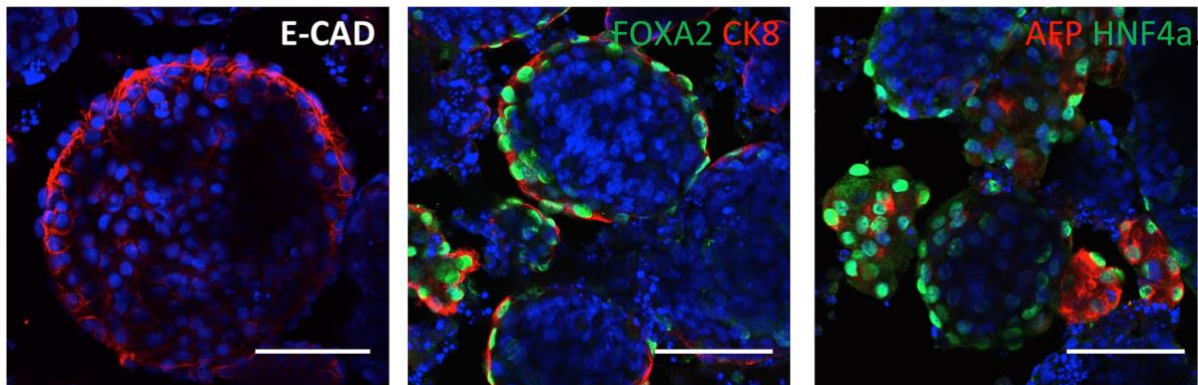

**Supplementary Figure 1. Organisation of D7 AG27 derived organoids.** Whole-mount immunostaining showing a cross section through the D7 organoids showing the restriction of epithelial (ECAD) and early hepatocyte markers (FOXA2, CK8, HNF4 $\alpha$ , AFP) to the outer surface of the organoids and their absence from the inner core. Nuclei stained with DRAQ5, scale bars are 100  $\mu$ m.

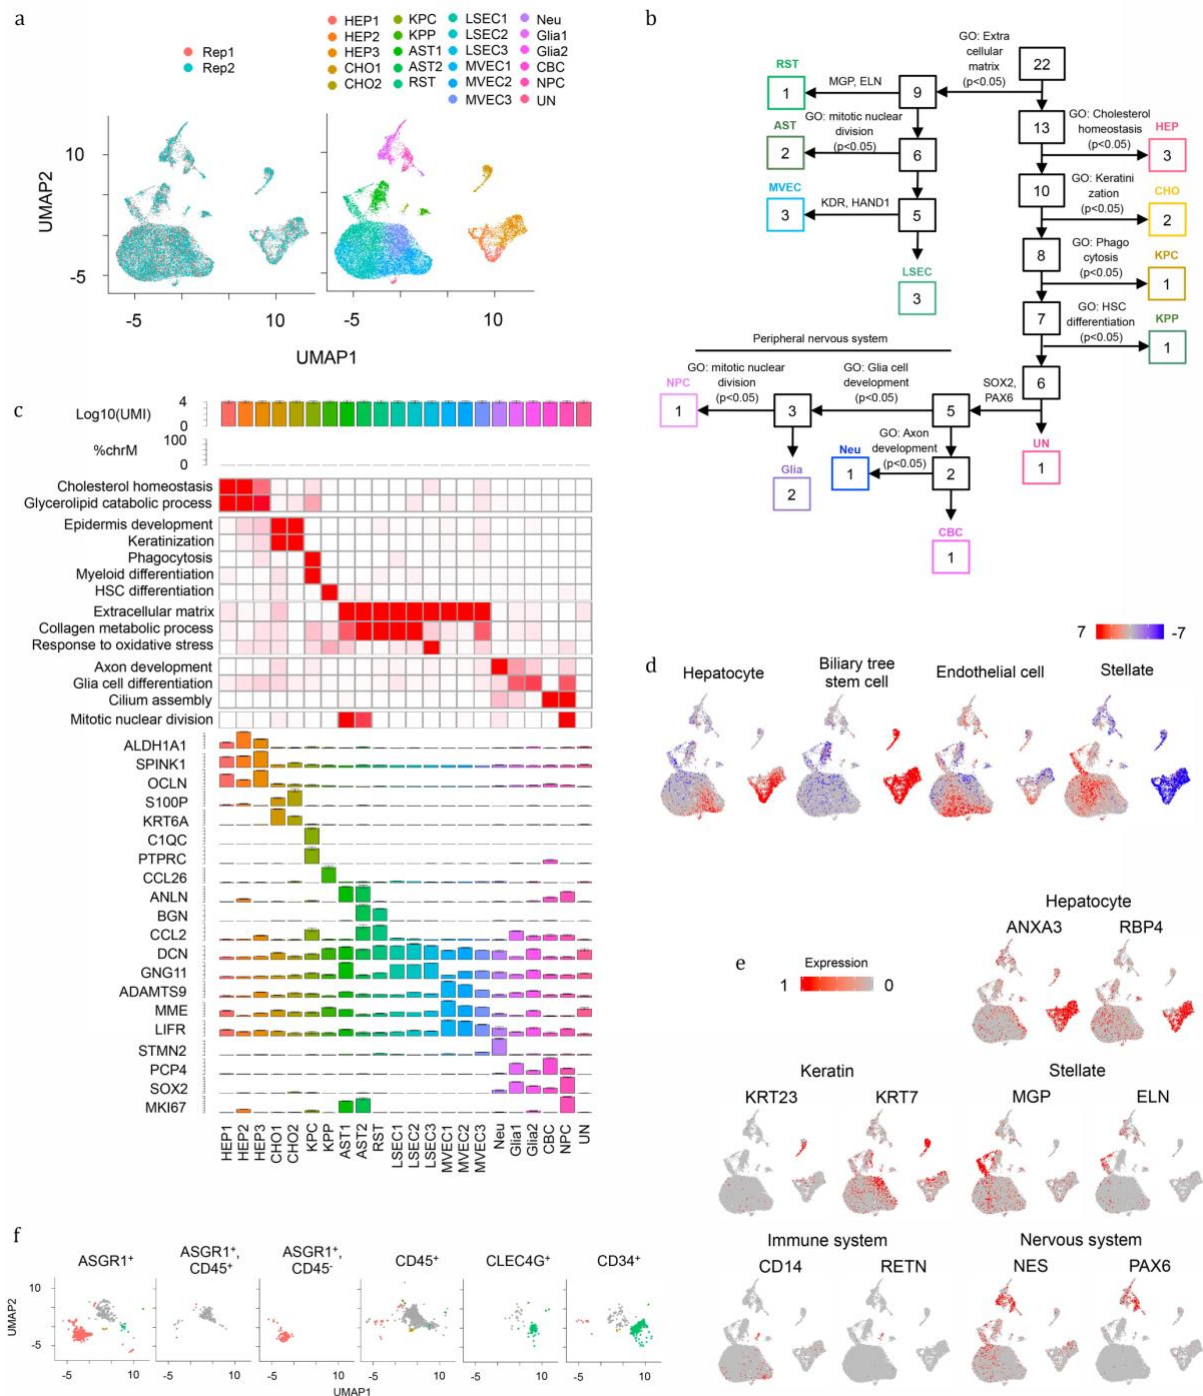

**Supplementary Figure 2. Cell Type Characterization in Single-Cell Transcriptome Profiles.** (a) UMAP plot of single cells distinguished by replicates and clusters. (b) Schematic representation of cluster annotation method. (c) Comparison of total UMI, percentage of mitochondria-derived reads, GO enrichment, representative gene markers across 22 clusters. (d) GSEA of gene signatures of hepatocyte, biliary tree stem cell, endothelial cell and stellate. The enrichment and depletion are scaled by  $-\log_{10}(\text{FDR})$  and shown by red and blue colors, respectively. (e) Expression pattern of cell-type specific markers in the liver organoid. Relative expression level is plotted from gray to red colors. (f) UMAP plots of FACS-sorted cells from human livers. Color scheme and UMAP dimension correspond to Fig. 2e. All above experiments were performed with the hiPSC line AG27.

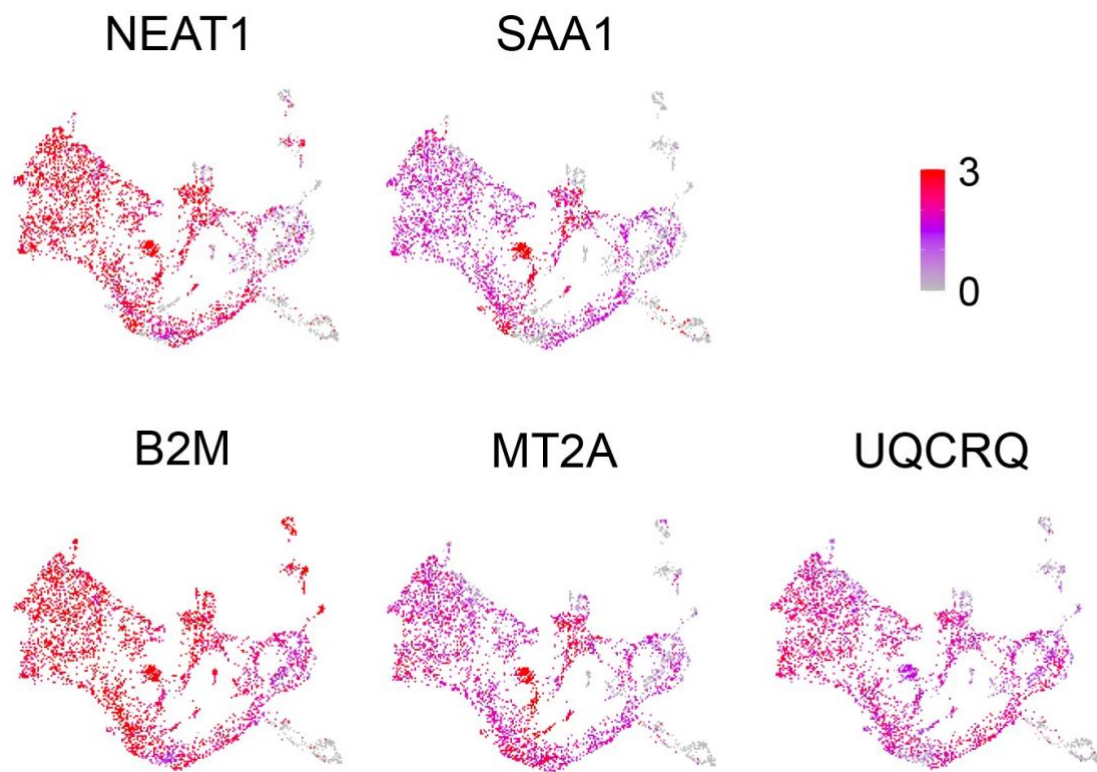

**Supplementary Figure 3. Analysis of scRNAseq organoid data vs. Adult Liver.** The analysis highlights representative genes that are highly expressed in adult hepatocyte and AG27 derived organoids. The colour represents gene expression (normalized RNA-seq read count).

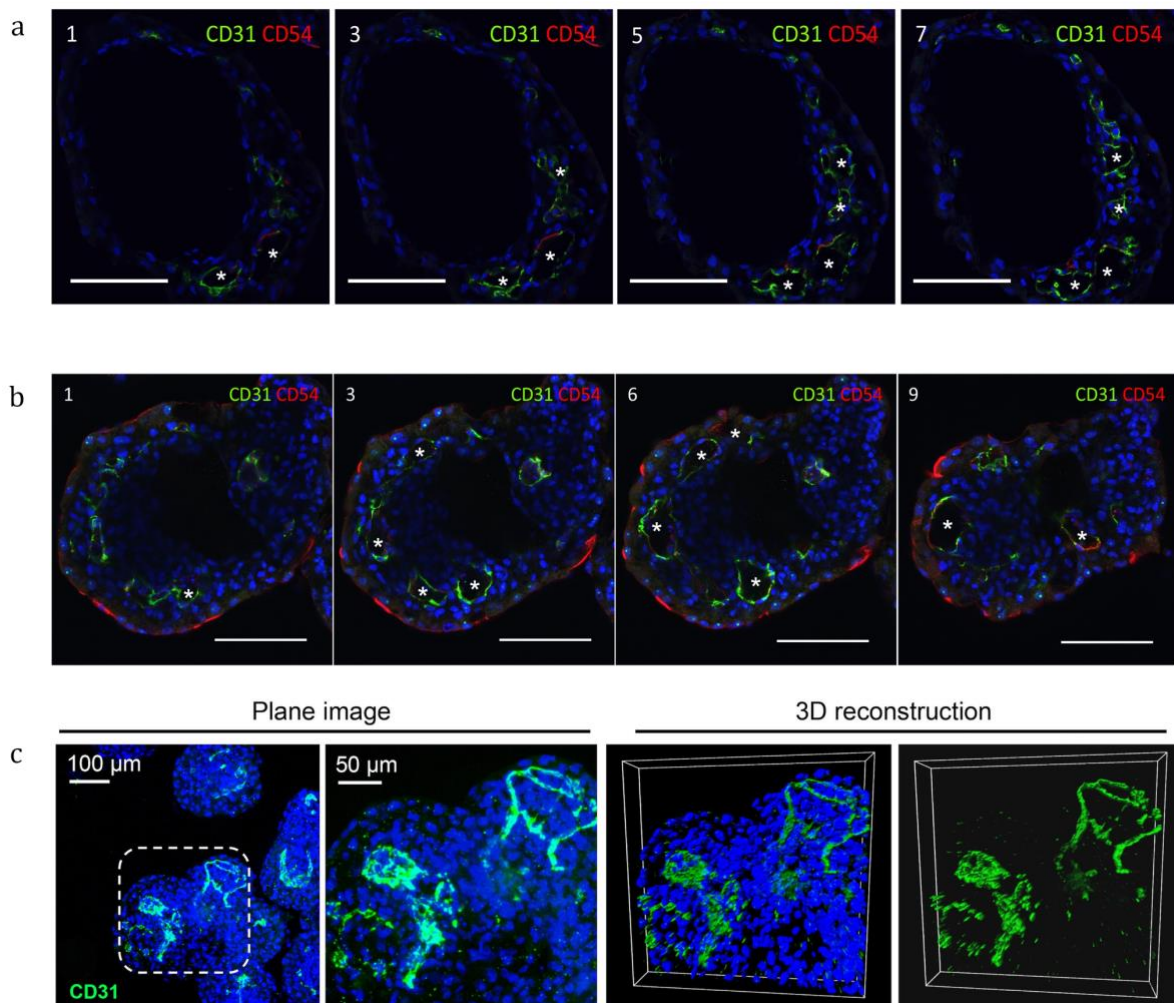

**Supplementary Figure 4. Endothelial structures in D20-D30 Organoids.** (a) and (b) z planes covering a volume of 35 μm (a) or 45 μm (b) from cryosections immunostained (same organoid as Fig. 5A) for the endothelial markers CD31 and CD54 showing continuity of luminal spaces and changes in endothelial marker expression towards the outer surface of the organoids. Number in top left (in white) represents position in the z volume, all Scale bars are 100 μm. (c) Immunofluorescence of CD31-expressing endothelial cells (green) shows establishment of vascular networks in organoids. With zoomed area in hatched white box, Hoechst 33342 (blue) dye was used to counterstain nuclei. Confocal 3D volume rendering of the organoid is presented on right panels, showing organoid structure both with nuclei and vascular networks only.

a

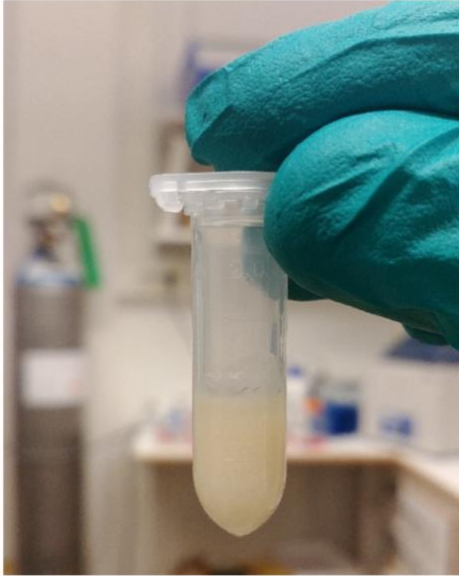

b

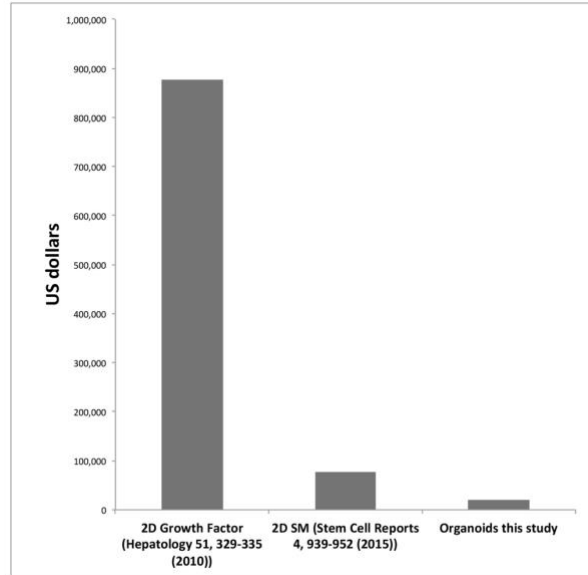

**Supplementary Figure 5. A Scalable Culture System.** (a) Image showing pellet of end stage organoids from 35 ml of suspension culture after centrifugation, approximately 18,000 organoids in a 700  $\mu$ l packed pellet. (b) Cost comparison in US dollars for the production of approximately  $2 \times 10^{10}$  cells based on a previously published methods using growth factor in 2D <sup>6</sup>, a small molecule-based differentiation <sup>8</sup> and this study.

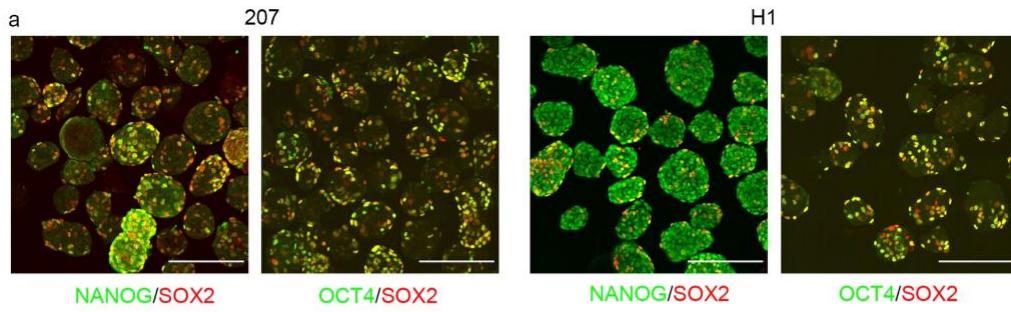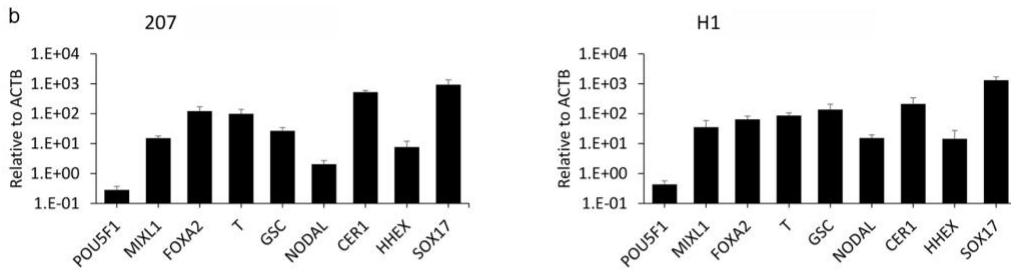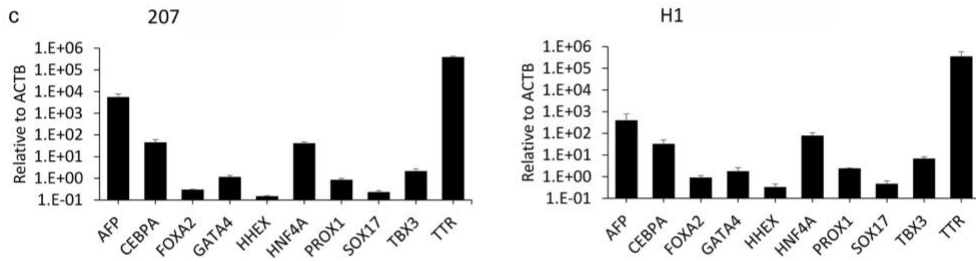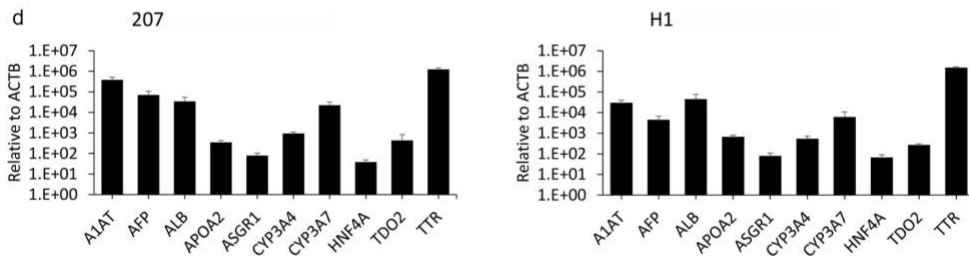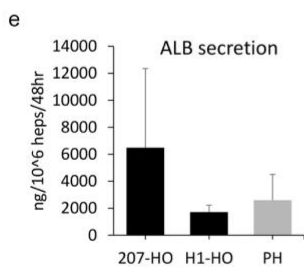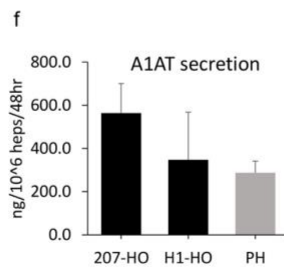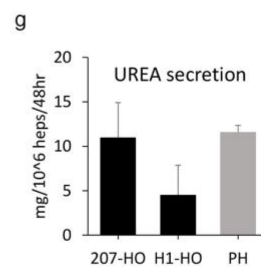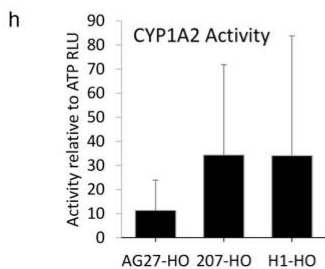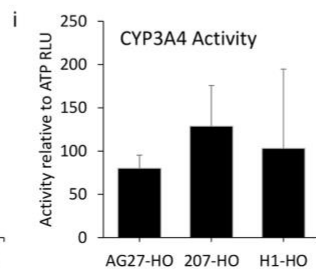

**Supplementary Figure 6. Characterising hESC (H1 and 207) derived organoids.** (a)

Representative images of Day 0 (D0) pluripotent spheroids derived from the hESC lines 207 and H1. Whole-mount immunostaining of the pluripotency markers OCT4, SOX2 and NANOG, scale bar is 200  $\mu\text{m}$ . (b) RT-qPCR analysis of pluripotency and DE associated genes at D2 of the differentiation relative to D0 spheroids on a log<sub>10</sub> scale, in hESC lines 207 and H1. Results from three independent experiments are presented as mean  $\pm$ SD. (c) RT-qPCR analysis of DE and early liver development genes at D7 of the differentiation relative to D2 on a log<sub>10</sub> scale, in hESC lines 207 and H1. Results from three independent experiments are presented as mean  $\pm$ SD. (d) RT-qPCR analysis of both early and later (developmentally) hepatocyte genes at D21 of the differentiation relative to D2 on a log<sub>10</sub> scale, in hESC lines 207 and H1. Results from three independent experiments are presented as mean  $\pm$ SD. (e) Demonstrating the production and secretion of albumin into the culture medium by D21 hESC lines 207 and H1 derived organoids (HO) and primary human hepatocytes (PH) after 48 hours as measured by ELISA (n=3, mean  $\pm$ SD) and normalized to mass per million hepatocytes. (f) Demonstrating the production and secretion of A1AT into the culture medium by D21 hESC lines 207 and H1 derived organoids and primary human hepatocytes after 48 hours as measured by ELISA (n=3, mean  $\pm$ SD) and normalized to mass per million hepatocytes. (g) Demonstrating the production and secretion of urea into the culture medium from 207 and H1 derived organoids and primary human hepatocytes after 48 hours and normalized to mass per million hepatocytes (n=3, mean  $\pm$ SD). (h) Assay comparing activity of CYP1A2 drug metabolizing enzyme from D23 to D30 in the PSC derived AG27, 207 and H1 organoids. Values were normalized to ATP assay performed on the same wells. Results from three independent experiments are presented as mean  $\pm$ SD. (i) Assay comparing activity of CYP3A4 drug metabolizing enzyme from D23 to D30 in the PSC derived AG27, 207 and H1 organoids. Values were normalized to ATP assay performed on the same wells. Results from three independent experiments are presented as mean  $\pm$ SD.

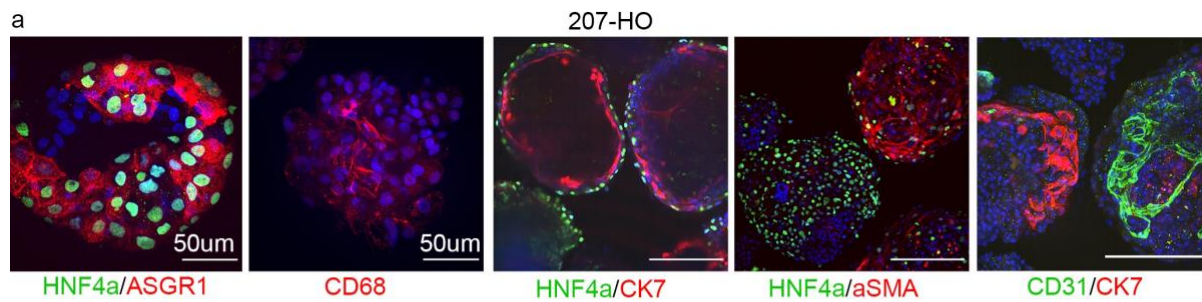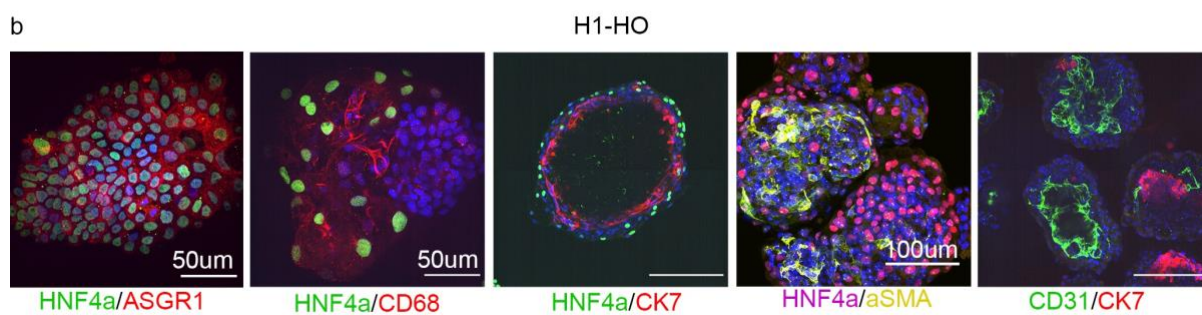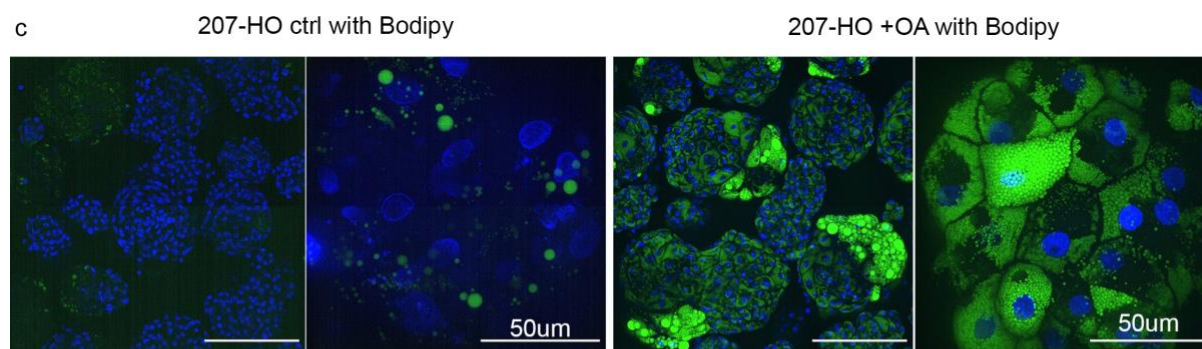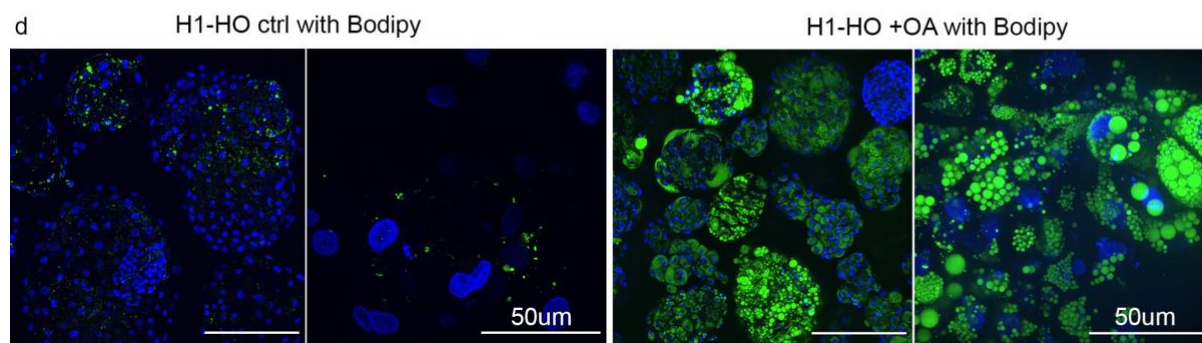



**Supplementary Figure 7. Characterising hESC (H1 and 207) derived organoids.** (a)

Wholemout immunostaining showing expression of various markers of liver cell types found within the organoids derived from hESC line 207. Showing hepatocyte markers (HNF4a and ASGR1), macrophage marker (CD68), cholangiocyte marker surrounding luminal space (CK7), stellate cell marker (aSMA) and endothelial structures (CD31). Scale bars are 200  $\mu\text{m}$  unless stated otherwise. (b) Wholemount immunostaining showing expression of various markers of liver cell types found within the organoids derived from hESC line H1. Showing hepatocyte markers (HNF4a and ASGR1), macrophage marker (CD68), cholangiocyte marker surrounding luminal space (CK7), stellate cell marker (aSMA) and endothelial structures (CD31). Scale bars are 200  $\mu\text{m}$  unless stated otherwise. (c) Whole-mount live imaging of Oleic acid treated (right two panels) and untreated (left two panels) 207 derived organoids showing accumulation of non-polar fats after treatment (BODIPY in green). Oleic acid was used at 300  $\mu\text{M}$  for 5 days from day 22. Scale bars are 200  $\mu\text{m}$  unless stated otherwise. (d) Whole-mount live imaging of Oleic acid treated (right two panels) and untreated (left two panels) H1 derived organoids showing accumulation of non-polar fats after treatment (BODIPY in green). Oleic acid was used at 300  $\mu\text{M}$  for 5 days from day 22. Scale bars are 200  $\mu\text{m}$  unless stated otherwise.

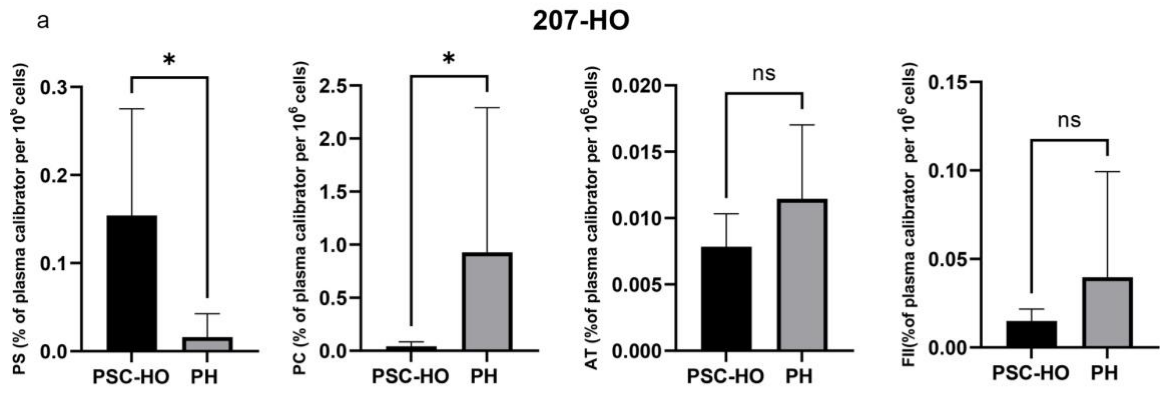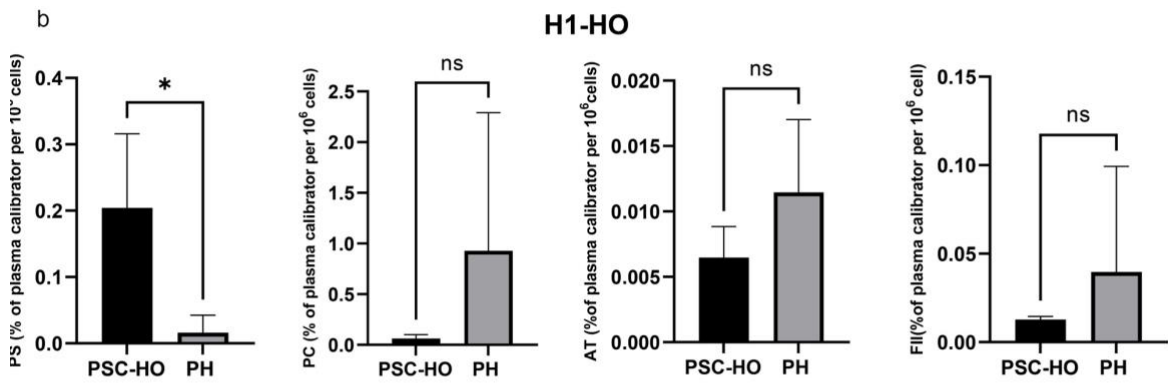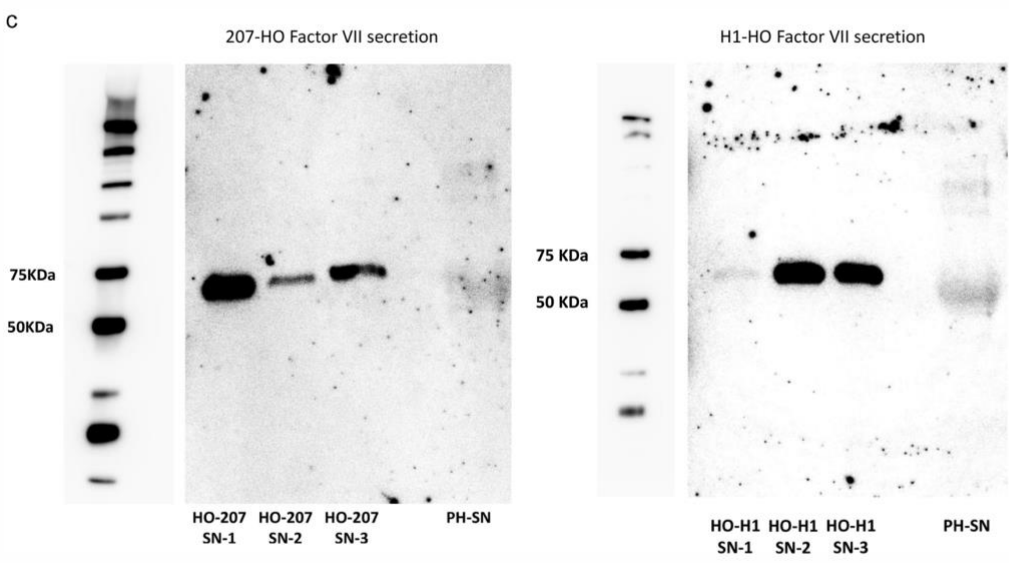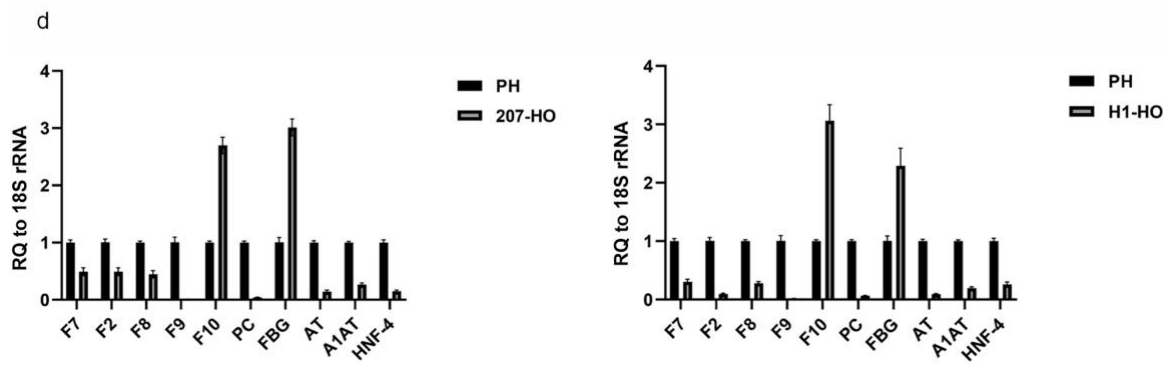

**Supplementary Figure 8. Characterising hESC (H1 and 207) derived organoids.** (a and b) Analysis of hESC (207 and H1) derived organoids (PSC-HO), for production and secretion of the coagulation factor II (FII) and coagulation factor inhibitors PS, PC and AT measured using the Procarta-plex assay. The total concentration of FII, PS, PC and AT (black bars) were adjusted to  $1 \times 10^6$  cells and the results are expressed as the percentage of plasma calibrator control. Primary hepatocytes (PH, grey bars) were used as control. Results are from three independent experiments and are presented as mean  $\pm$ SD. Statistical significance was assessed with Mann-Whitney test (\*  $p < 0.05$ ). (c) Western assessment of hESC (207 and H1) derived organoids (HO) for the secretion of coagulation FVII into the culture medium. Primary hepatocytes (PH) were used as control. Three independent experiments using hESC (207 and H1) derived organoids (HO) were used. (d) Analysis of mRNA expression demonstrating levels of coagulation factors and inhibitors in hESC (207 and H1) derived organoids (grey bars) and primary human hepatocytes (black bars-PH). mRNA levels of coagulation factors II, VII, VIII, IX, X, fibrinogen (F2, F7, F8, F9, F10, FBG), coagulation inhibitors protein C and antithrombin (PC, AT) and the hepatic markers alpha-1 antitrypsin (A1AT) and hepatocyte nuclear factor 4 alpha (HNF4 $\alpha$ ) were determined using quantitative RT-qPCR with 18S as endogenous control. The results are presented as the mean of the fold-change expression of the respective gene. Results from three independent experiments are presented as mean  $\pm$ SD.

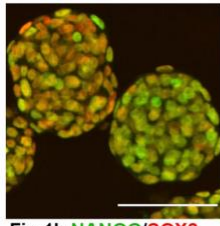

Fig 1b NANOG/SOX2

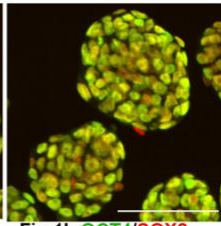

Fig 1b OCT4/SOX2

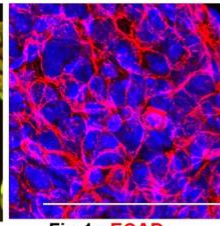

Fig 1g ECAD

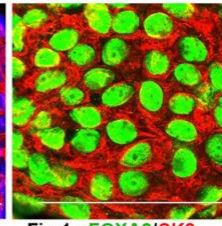

Fig 1g FOXA2/CK8

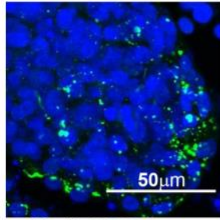

Fig 1h MESP1

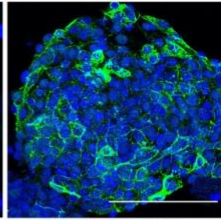

Fig 1h ALCAM

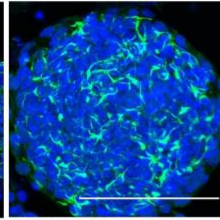

Fig 1h WT1

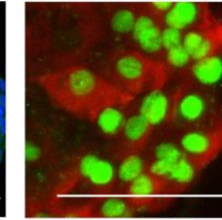

Fig 4a HNF4a/GS

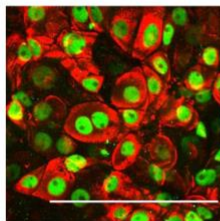

Fig 4a HNF4a/CPS1

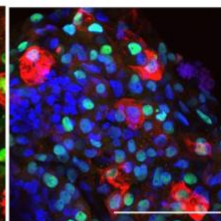

Fig 4a HNF4a/CYP2A6

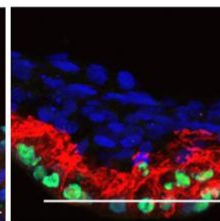

Fig 4a HNF4a/ASGR1

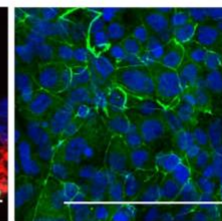

Fig 4a ZO-1

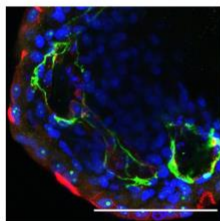

Fig 5a CD31/CD54

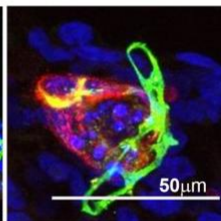

Fig 5c CD31/CD34

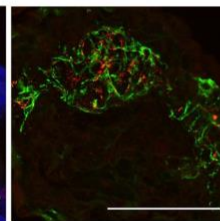

Fig 5e CD31/FVIII

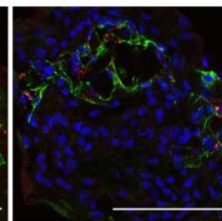

Fig 5e CD31/FVIII

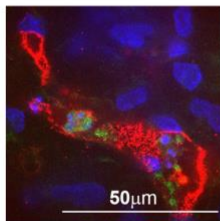

Fig 5f AcLDL/CD54

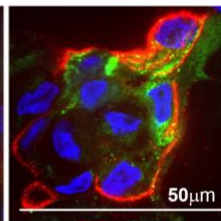

Fig 5f FSA/CD54

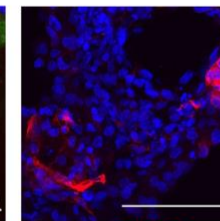

Fig 6a TUBB3

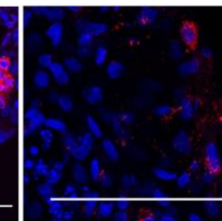

Fig 6c CD68

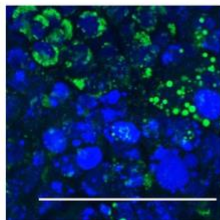

Fig 7e BODIPY

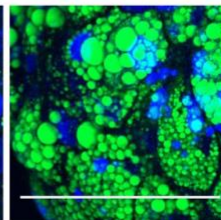

Fig 7e BODIPY

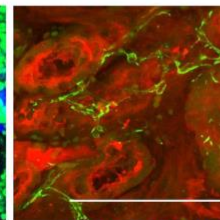

Fig 7g hCD31/DEXTRAN

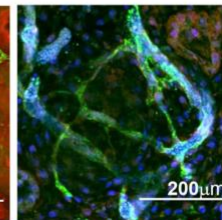

Fig 7g hCD31/DEXTRAN

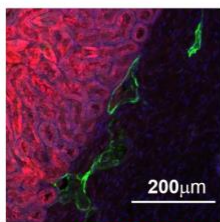

Fig 7g CK7/DEXTRAN

**Supplementary Figure 9. Overview of zoomed images from the main manuscript.** Zoomed in images from selected main figures (Fig. 1, 4, 5, 6, and 7) as indicated, to better visualise detail. Scale bars are 100  $\mu$ m unless stated otherwise.

**Supplementary Table 1. Overlapping and exclusive protein list linked to Fig 3a.**

**Supplementary Table 2**

| <b>Taqman assay</b>      | <b>Catalog number</b> | <b>Supplier</b>          |
|--------------------------|-----------------------|--------------------------|
| Hs01551992_m1 (F7)       | 4331182               | Thermo Fisher Scientific |
| Hs01011988_m1 (F2)       | 4331182               | Thermo Fisher Scientific |
| Hs00252034_m1 (F8)       | 4331182               | Thermo Fisher Scientific |
| Hs01592597_m1 (F9)       | 4331182               | Thermo Fisher Scientific |
| Hs00173450_m1 (F10)      | 4331182               | Thermo Fisher Scientific |
| Hs00165584_m1 (PROC)     | 4331182               | Thermo Fisher Scientific |
| Hs00170586_m1 (FGB)      | 4331182               | Thermo Fisher Scientific |
| Hs00166654_m1 (SERPINC1) | 4331182               | Thermo Fisher Scientific |
| Hs01097800_m1 (SERPINA1) | 4331182               | Thermo Fisher Scientific |
| Hs00230853_m1 (HNF4A)    | 4331182               | Thermo Fisher Scientific |
| Hs99999901_s1 (18S)      | 4331182               | Thermo Fisher Scientific |
| Hs01005019_m1 (ASGR1)    | 4331182               | Thermo Fisher Scientific |
| Hs01053049_s1 (SOX2)     | 444892                | Thermo Fisher Scientific |
| Hs04260366_g1 (NANOG)    | 444892                | Thermo Fisher Scientific |
| Hs00430824_g1 (MIXL1)    | 444892                | Thermo Fisher Scientific |
| Hs00232764_m1 (FOXA2)    | 444892                | Thermo Fisher Scientific |
| Hs00751752_s1 (SOX17)    | 444892                | Thermo Fisher Scientific |
| Hs00242160_m1 (HHEX)     | 444892                | Thermo Fisher Scientific |
| Hs00173490_m1 (AFP)      | 444892                | Thermo Fisher Scientific |
| Hs00269972_s1 (CEBPA)    | 444892                | Thermo Fisher Scientific |
| Hs00171403_m1 (GATA4)    | 444892                | Thermo Fisher Scientific |
| Hs00426361_m1 (CYP3A7)   | 444892                | Thermo Fisher Scientific |
| Hs00910225_m1 (ALB)      | 444892                | Thermo Fisher Scientific |
| Hs00199611_m1 (TDO2)     | 444892                | Thermo Fisher Scientific |
| Hs00610080_m1 (T)        | 4331182               | Thermo Fisher Scientific |
| Hs00896293_m1 (PROX1)    | 4331182               | Thermo Fisher Scientific |
| Hs00195612_m1 (TBX3)     | 4331182               | Thermo Fisher Scientific |

|                        |         |                          |
|------------------------|---------|--------------------------|
| Hs00999634_gH (POU5F1) | 4331182 | Thermo Fisher Scientific |
| Hs00906630_g1 (GSC)    | 4331182 | Thermo Fisher Scientific |
| Hs00415443_m1 (NODAL)  | 4331182 | Thermo Fisher Scientific |
| Hs00193796_m1 (CER1)   | 4331182 | Thermo Fisher Scientific |
| Hs00846731_s1 (SOX7)   | 4331182 | Thermo Fisher Scientific |
| Hs00174914_m1 (TTR)    | 4331182 | Thermo Fisher Scientific |
| Hs00952079_g1 (APOA2)  | 4331182 | Thermo Fisher Scientific |
| Hs00604506_m1 (CYP3A4) | 4331182 | Thermo Fisher Scientific |

### Primary Antibodies, Secondary Antibodies, ELISAs and Serum

| Marker        | Supplier                     | Catalogue No. | Species | Dilution     |
|---------------|------------------------------|---------------|---------|--------------|
| $\alpha$ SMA  | Invitrogen                   | MA5-11547     | Rabbit  | 1:400        |
| ALB           | Sigma Aldrich                | A6684         | Mouse   | 1:600        |
| ALB           | Thermofisher                 | MA5-29022     | Rabbit  | 1:100        |
| ALCAM         | Santa Cruz                   | sc-74558      | Mouse   | 1:200        |
| AFP           | Sigma Aldrich                | A8452         | Mouse   | 1:600        |
| ASGPR1        | Santa Cruz                   | sc-5623       | Mouse   | 1:200        |
| B3 Tubulin    | Santa Cruz                   | sc-80005      | Mouse   | 1:200        |
| Beta-actin    | Sigma Aldrich                | A5441         | Mouse   | 1:5000       |
| CD31          | Abcam                        | ab32457       | Rabbit  | 1:1000       |
| CD34          | Santa Cruz                   | sc-7324       | Mouse   | 1:200        |
| CD54          | Thermofisher                 | MA5-1301      | Mouse   | 1:100        |
| CD68          | Santa Cruz                   | sc-20060      | Mouse   | 1:300        |
| CD73          | Sigma                        | HPA017357     | Rabbit  | 1:500        |
| CK19          | Amersham                     | RPM1165       | Mouse   | 1:150        |
| CK7           | DAKO                         | M7018         | Mouse   | 1:100        |
| CK7           | Abcam                        | ab181598      | Rabbit  | 1:100        |
| CK8           | DAKO                         | M0631         | Mouse   | 1:100        |
| CPS1          | Santa Cruz                   | sc-376190     | Mouse   | 1:150        |
| CYP2A6        | Origene                      | TA503832      | Mouse   | 1:100        |
| ECAD          | Santa Cruz                   | sc-2179       | Mouse   | 1:75         |
| FII           | Novus Biologicals            | NBP1-58268    | Rabbit  | 3 $\mu$ g/ml |
| FOXA2         | Abcam                        | Ab108422      | Rabbit  | 1:300        |
| GS            | Transduction<br>Laboratories | G45020/L1     | Mouse   | 1:250        |
| HNF4 $\alpha$ | Santa Cruz                   | sc-8987       | Rabbit  | 1:300        |
| HNF4 $\alpha$ | Abcam                        | ab201460      | Rabbit  | 1:100        |
| LAM           | Thermofisher                 | PA5-16287     | Rabbit  | 1:250        |
| LYVE1         | Abcam                        | ab33682       | Rabbit  | 1:200        |
| MESP1         | Thermofisher                 | PA5-67086     | Rabbit  | 1:300        |
| MRP2          | Abcam                        | ab3373        | Mouse   | 1:100        |
| Nanog         | Stemgent                     | 09-0020       | Rabbit  | 1:100        |
| OCT4          | Stemgent                     | 09-0023       | Rabbit  | 1:100        |
| SOX2          | Stemgent                     | 09-0024       | Rabbit  | 1:100        |
| WT1           | Thermofisher                 | PA5-16879     | Rabbit  | 1:300        |
| ZO1           | Santa Cruz                   | sc-33725      | Rat     | 1:50         |

|                            |                   |           |        |         |
|----------------------------|-------------------|-----------|--------|---------|
| Alexafluor'488'anti-rabbit | Life Technologies | A21206    | Donkey | 1:1500  |
| Alexafluor'488'anti-mouse  | Life Technologies | A11059    | Rabbit | 1:1500  |
| Alexafluor'594'anti-mouse  | Life Technologies | A11005    | Goat   | 1:1500  |
| Alexafluor'488'anti-rat    | Life Technologies | A11006    | Goat   | 1:1500  |
| Mouse anti rabbit (HRP)    | Santa Cruz        | sc-2357   |        | 1:10000 |
| m-IgGk BP-HRP              | Santa Cruz        | sc-516102 |        | 1:10000 |
| Phalloidin-594             | Thermofisher      | A12381    |        |         |
| Human Albumin ELISA        | Bethyl Labs       | e88-129   |        |         |
| Goat serum                 | Sigma             | G9023     |        |         |
